# Supplementary material for: Music Therapy Effectively Alleviates Public Anxiety, Depression, and Sleep Disorders Caused by the COVID-19 Pandemic: an online survey and evaluation across China Running title：Psychological stress during the COVID-19 pandemic across China
Source: Research Square preprint supplement (doi:10.21203/rs.3.rs-6548684/v1), 2025-05-30
Supplement: Supplementary file 1 [file 401371949c70cf3c09591f3d.docx]

**Supplementary Table 1**. Multiple linear regression analysis of scale scores

| Variable | Estimated regression coefficients | Standard error | t | *p* value |
| --- | --- | --- | --- | --- |
| **SDS** |  |  |  |  |
| February 3 and before | Ref |  |  |  |
| February 4-9 | -1.774 | 0.220 | -8.061 | <0.001 |
| February 10-15 | 0.010 | 0.221 | 0.046 | 0.963 |
| February 16 and after | 4.941 | 0.177 | 27.870 | <0.001 |
| **SAS** |  |  |  |  |
| February 3 and before | Ref |  |  |  |
| February 4-9 | -0.904 | 0.159 | -5.683 | <0.001 |
| February 10-15 | 0.588 | 0.144 | 4.087 | <0.001 |
| February 16 and after | 3.708 | 0.124 | 29.863 | <0.001 |
| **PSQI** |  |  |  |  |
| February 3 and before | Ref |  |  |  |
| February 4-9 | 0.459 | 0.338 | 1.359 | 0.174 |
| February 10-15 | 1.043 | 0.672 | 1.551 | 0.121 |
| February 16 and after | -1.595 | 0.178 | -8.959 | <0.001 |
